# Supplementary material for: Risk of Dementia in Seniors With Newly Diagnosed Diabetes: A Population-Based Study
Source: Oxford University Press journal article supplement (doi:10.2337/dc15-0491), 2015-07-27
Supplement: dc150491supplementarydata.pdf [file dc150491supplementarydata.pdf]

SUPPLEMENTARY DATA

**Supplementary Table S1. Diagnostic and procedure codes for covariates**

| Variable name | Event                  | Hospitalization records                                |                                                 |                     |                                                | Physicians' Services Claims |                                                                        |
|---------------|------------------------|--------------------------------------------------------|-------------------------------------------------|---------------------|------------------------------------------------|-----------------------------|------------------------------------------------------------------------|
|               |                        | Diagnostic codes                                       |                                                 | Procedure codes     |                                                | Diagnostic codes            | Fee codes                                                              |
|               |                        | ICD9                                                   | ICD10                                           | CCP                 | CCI                                            |                             |                                                                        |
| <b>CAD</b>    | AMI                    | 410.x                                                  | I21, I22                                        |                     |                                                |                             |                                                                        |
|               | PCI                    |                                                        |                                                 | 48.02, 48.03, 48.09 | 1IJ50, 1IJ57GQ                                 |                             |                                                                        |
|               | CABS                   |                                                        |                                                 | 48.11-48.19, 48.2   | 1IJ76                                          |                             |                                                                        |
| <b>CVD</b>    | Stroke                 | 431, 434, 436                                          | 161, 163, 164                                   |                     |                                                |                             |                                                                        |
|               | Carotid endarterectomy |                                                        |                                                 | 50.12               | 1JE57                                          |                             |                                                                        |
|               | TIA                    | 435                                                    | G450, G453, G458, G459                          |                     |                                                |                             |                                                                        |
| <b>PVD</b>    | LE bypass surgery      |                                                        |                                                 | 51.25. 51.29*       | 1KG50, 1KG57, 1KG76,**<br>1KG35HAC1, 1KG35HHC1 |                             |                                                                        |
|               | PTA                    |                                                        |                                                 |                     |                                                |                             | J025***                                                                |
| <b>CKD</b>    | CKD                    | 403.x, 404.x, 582.X, 583.X, 585.X, 586.X, 587.X, 588.X | I12.0, I13.1, N03.X, N05.X, N18.X, N19.X, N25.X |                     |                                                | 403, 585                    |                                                                        |
|               | Hemodialysis           |                                                        |                                                 |                     |                                                |                             | R849, G323, G325, G326, G860, G862, G863, G865, G866                   |
|               | Peritoneal dialysis    |                                                        |                                                 |                     |                                                |                             | G330, G331, G332, G861, G864                                           |
|               | CRRT                   |                                                        |                                                 |                     |                                                |                             | G082, G083, G085, G090, G091, G092, G093, G094, G095, G096, G294, G295 |
|               | Miscellaneous          |                                                        |                                                 |                     |                                                |                             | G333, H540                                                             |

The Canadian Institute of Health Information (CIHI) Hospital Discharge Abstract Database used ICD9 coding for diagnoses and Canadian Classification of Procedures (CCP) coding for procedures prior to April 1, 2002; ICD10 coding and the Canadian Classification of Intervention (CCI) coding was used from April 1, 2002 onwards. Physicians' Services Claims from the Ontario Health Insurance Plan (OHIP) Database.

\*Any of the above CCP codes unless any of the following ICD9 codes listed in the hospital record: 441.3-441.7, 442.0, 442.2, 442.3

\*\*Any of the above CCI codes unless any of the following ICD10 codes listed in the hospital record: I67.1, I71, I72, I60, I77.0, I79.0, Q.codes

\*\*\* Fee code not included if any of the following diagnostic codes listed on the OHIP claim 403, 584, 585, 586, 593.8 (renal PTCA), 435 and 437

CAD: Coronary artery disease; CVD: Cerebrovascular disease; PVD: Peripheral vascular disease; CKD: Chronic kidney disease;

AMI: Acute Myocardial Infarction; PCI: Percutaneous coronary Intervention; CABS: Coronary Artery Bypass Surgery

TIA: Transient Ischemic Attack; LE: Lower extremity; PTA: Percutaneous transluminal angioplasty; CRRT: Continuous renal replacement therapy
